# Supplementary material for: Impact of Static-Oriented Electric Fields on the Kinetics of Some Representative Suzuki–Miyaura and Metal-Cluster Mediated Reactions
Source: MDPI journal article supplement (doi:10.3390/molecules28166169), 2023-08-21
Supplement: s1 [file s1]

# Impact of Static-Oriented Electric Fields on the Kinetics of Some Representative Suzuki–Miyaura and Metal-Cluster Mediated Reactions

Navya Arepalli <sup>1,†</sup>, Sukanta Mondal <sup>2,†</sup>, Debdutta Chakraborty <sup>1,\*</sup> and Pratim Kumar Chattaraj <sup>1,\*</sup>

<sup>1</sup> Department of Chemistry, Birla Institute of Technology, Mesra, Ranchi 835215, Jharkhand, India

<sup>2</sup> Department of Education, A. M. School of Educational Sciences, Assam University, Silchar 788011, Assam, India

\* Correspondence: debdutta.chakraborty@bitmesra.ac.in (D.C.); pkc@chem.iitkgp.ac.in (P.K.C.)

† These authors contributed equally to this work.

## Supporting Information

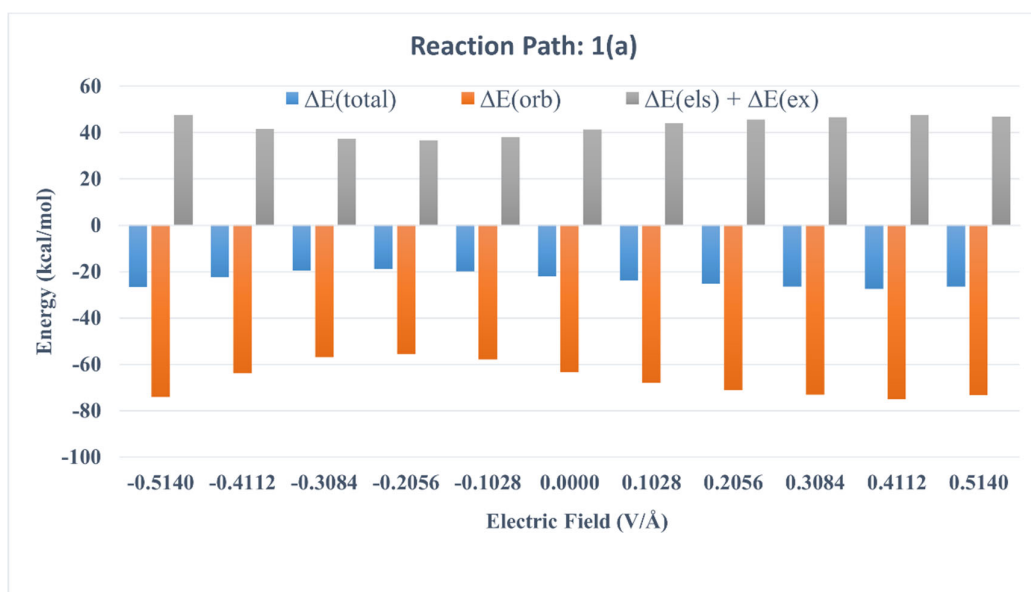

Figure S1: Results of EDA for reaction 1a.

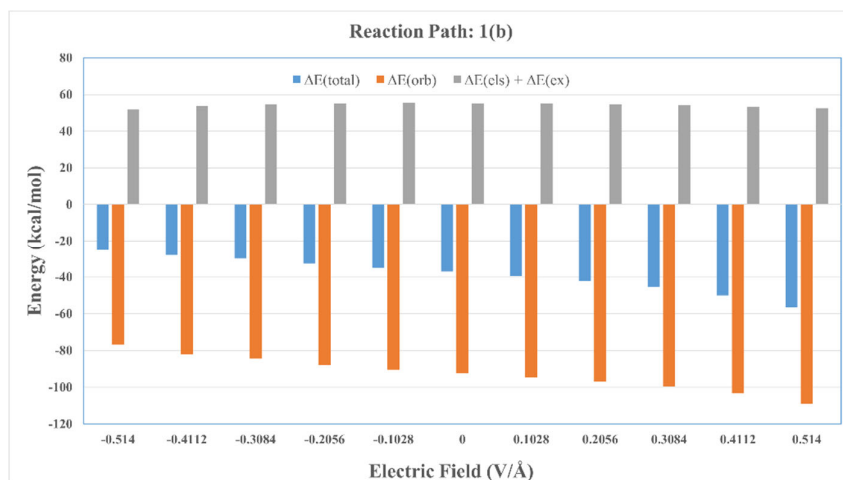

Figure S2: Results of EDA for reaction 1b.

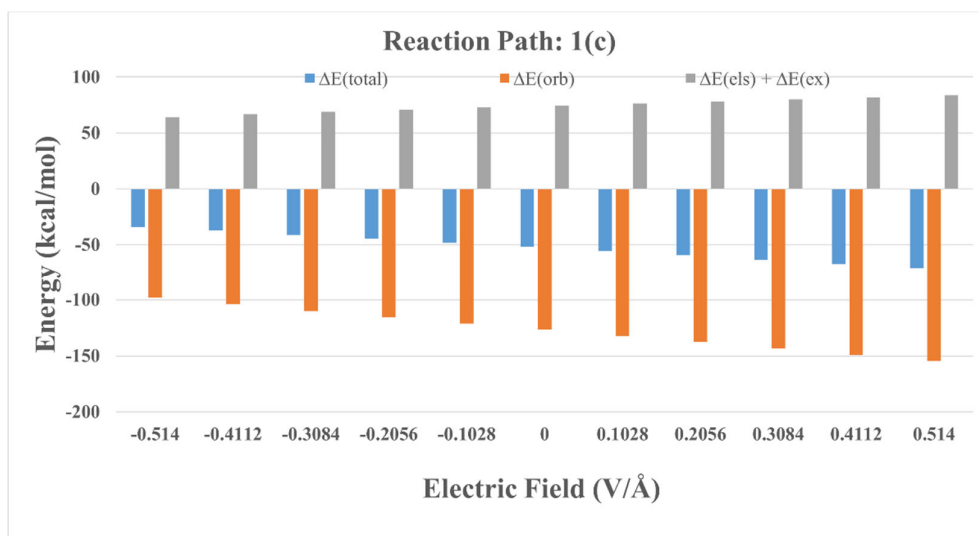

**Figure S3:** Results of EDA for reaction 1c.

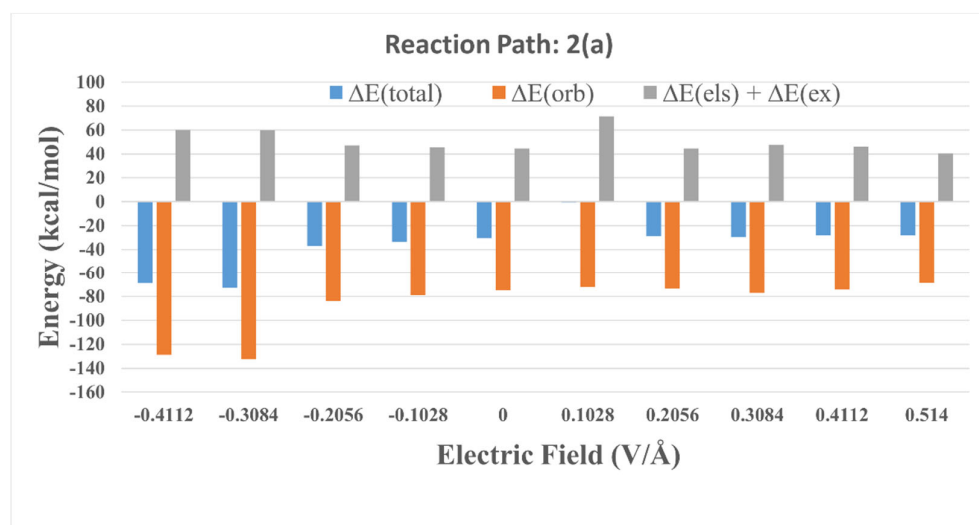

**Figure S4:** Results of EDA for reaction 2a.

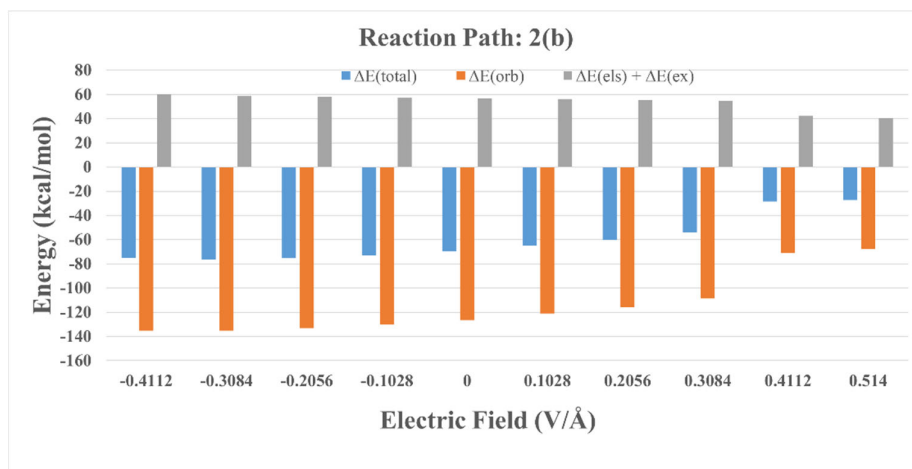

**Figure S5:** Results of EDA for reaction 2b.

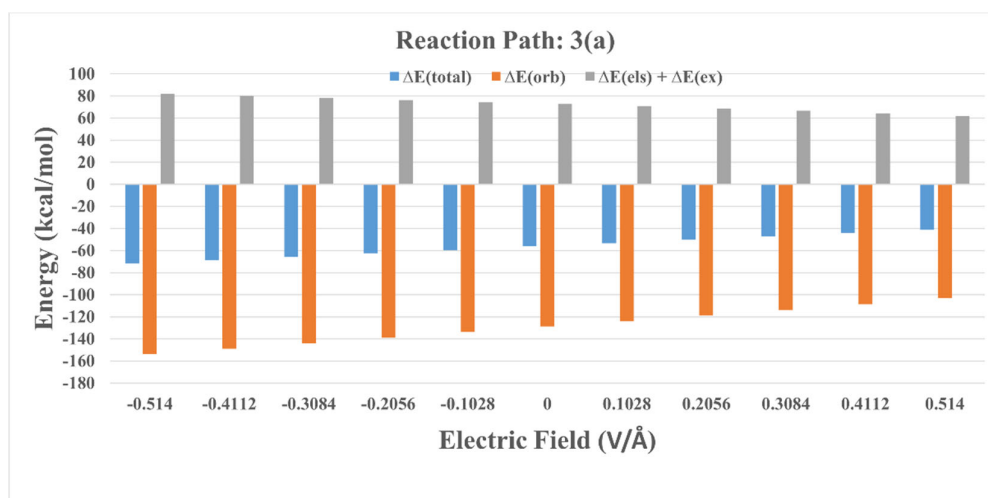

**Figure S6:** Results of EDA for reaction 3a.

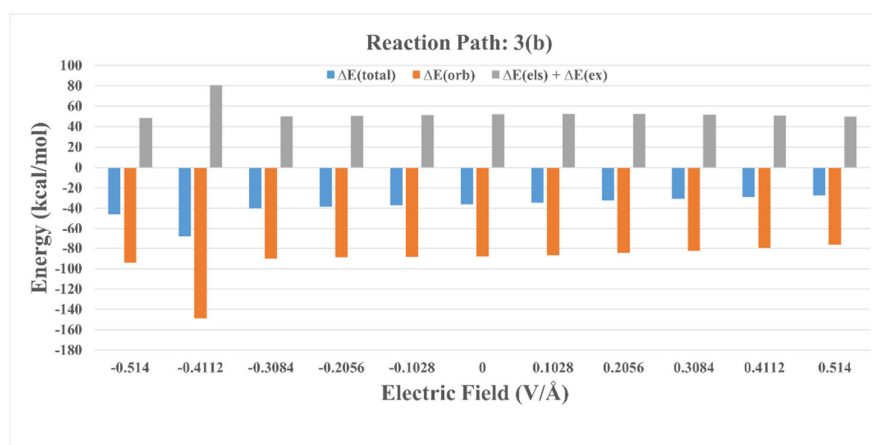

**Figure S7:** Results of EDA for reaction 3b.

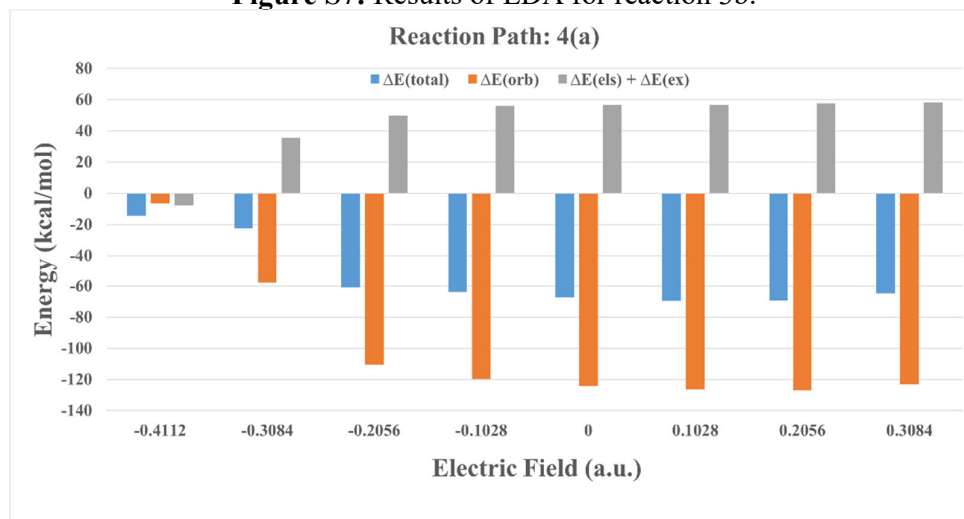

**Figure S8:** Results of EDA for reaction 4a.

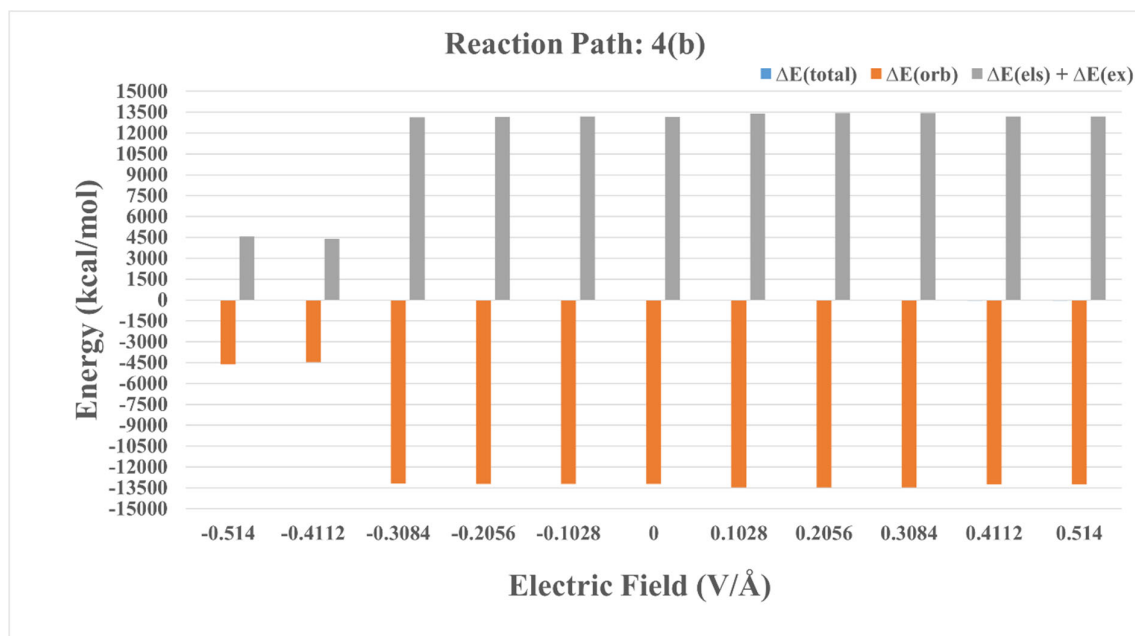

**Figure S9:** Results of EDA for reaction 4b.

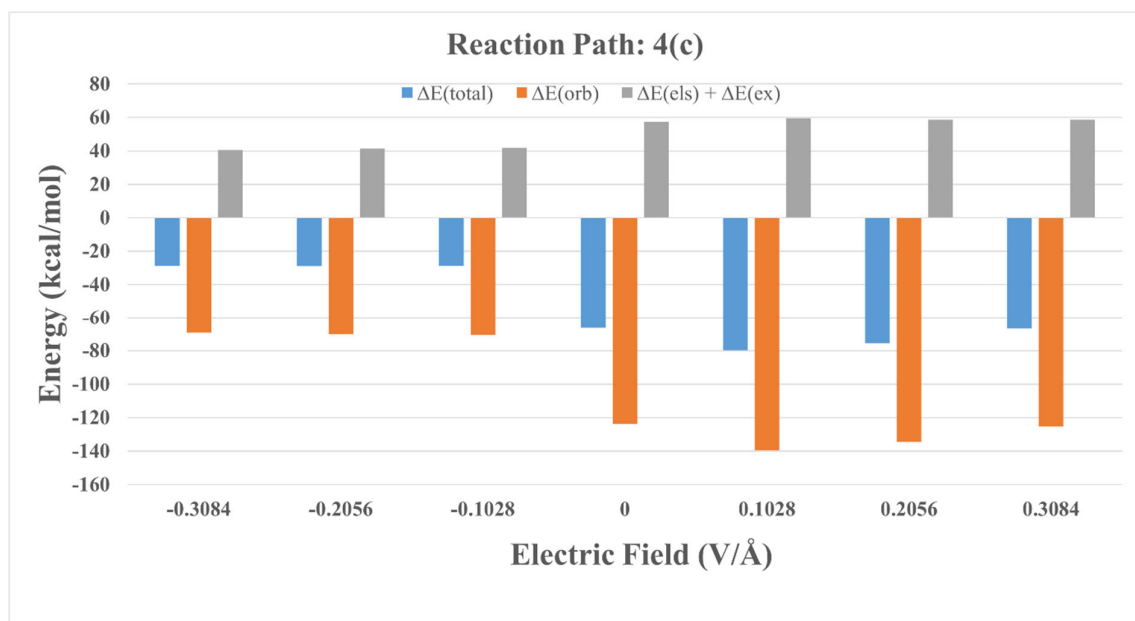

**Figure S10:** Results of EDA for reaction 4c.

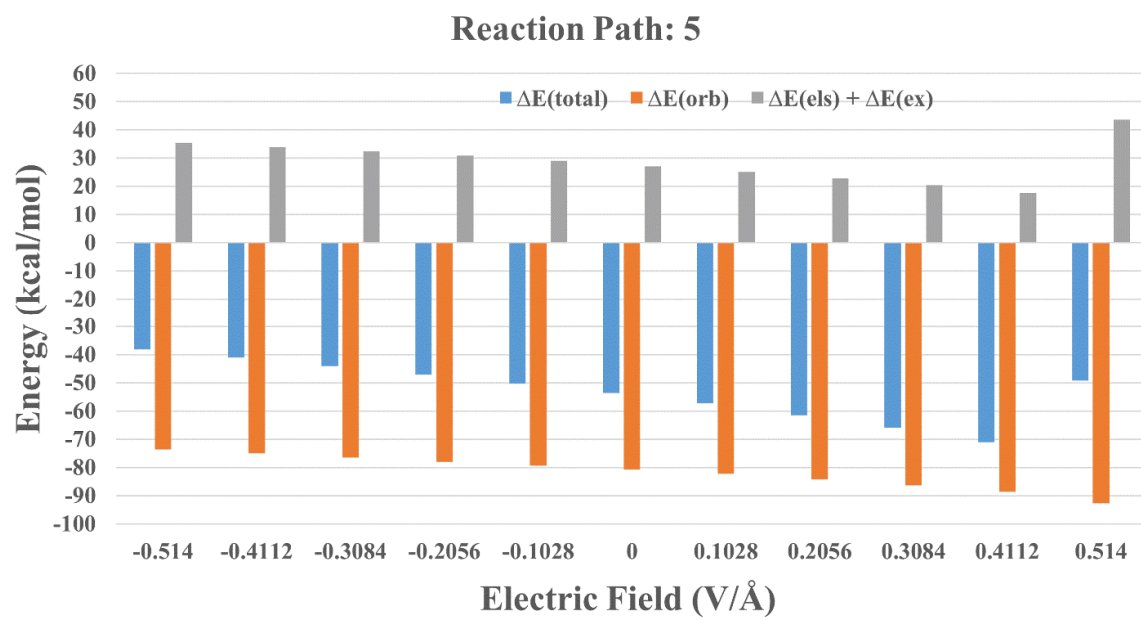

**Figure S11:** Results of EDA for reaction 5.
